# Supplementary material
Source: ML conference proceedings conference paper supplement (https://proceedings.neurips.cc/paper_files/paper/2016/hash/8bf1211fd4b7b94528899de0a43b9fb3-Abstract.html)
Supplement: Supplementary file [file 8bf1211fd4b7b94528899de0a43b9fb3-Supplemental.zip]

# Supplementary Material

## Dynamic Filter Networks

### 1 Video Prediction

In this section, we add more results of the experiments on the moving MNIST and highway driving datasets. We added an animated gif-file for every sequence we show here.

#### 1.1 Moving MNIST

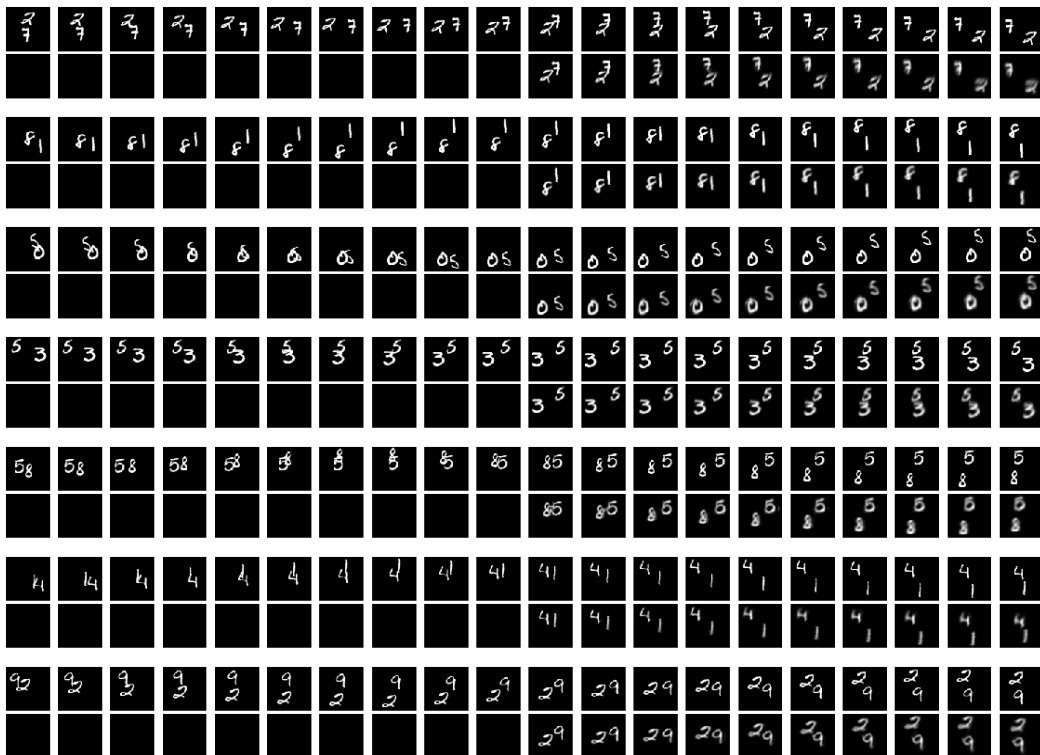

Figure 1: Results on moving MNIST dataset with 2 moving digits. In the first row, the left half are input sequence and the right half are ground truth of the future frames; in the second row, the right half is the prediction of our model.

We visualize the dynamically generated filter for the first predicted frame.

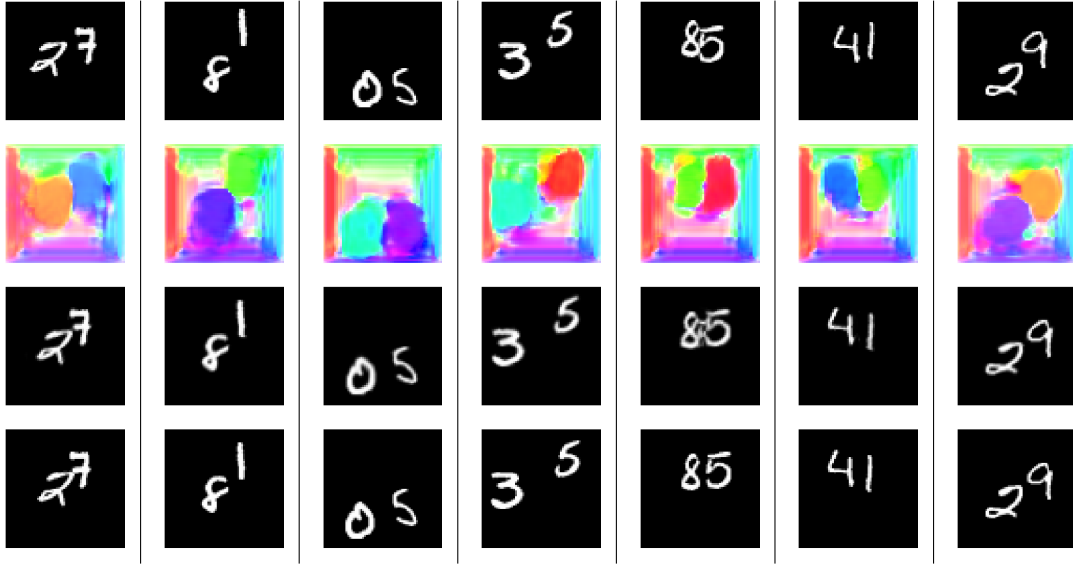

Figure 2: Visualization of the dynamically generated filters. The first row are the previous frame, the second row are the visualization of filters, the third row are our prediction of the current frame and the fourth row are the ground truth.

5

- 6 We also run the model which is trained on 2 moving digits on out-of-domain data which has 1 moving digit or 3 moving digits. It shows the model has good generalization ability.

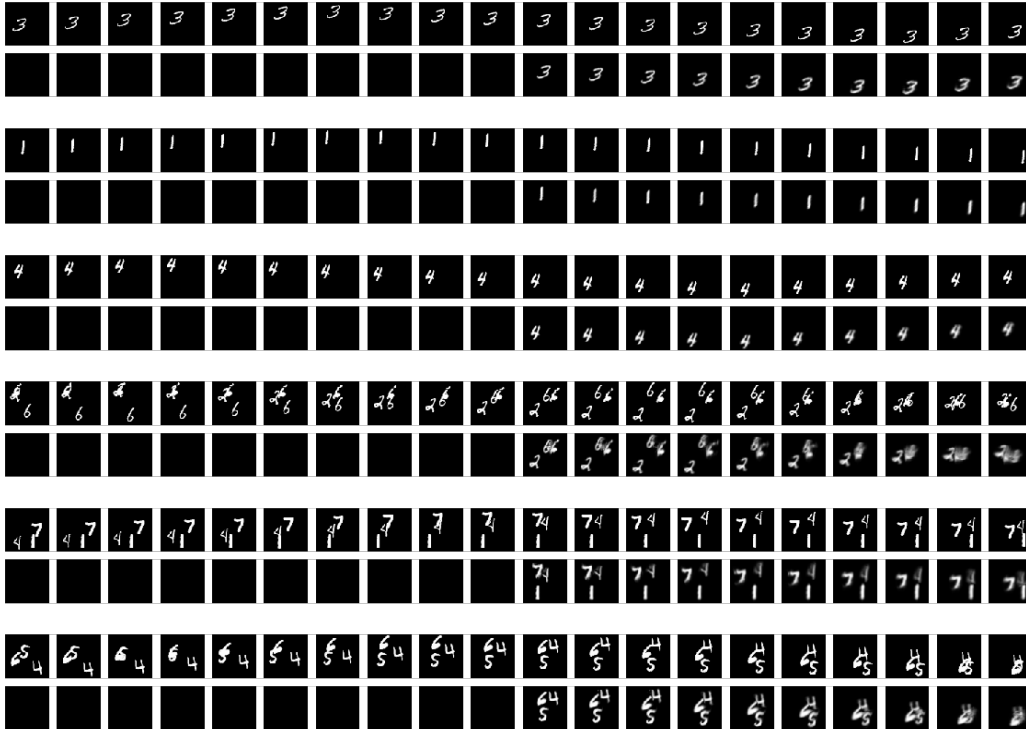

Figure 3: Results of out-of-domain input experiment with 1 moving digit and 3 moving digits.

7

## 8 1.2 Highway driving

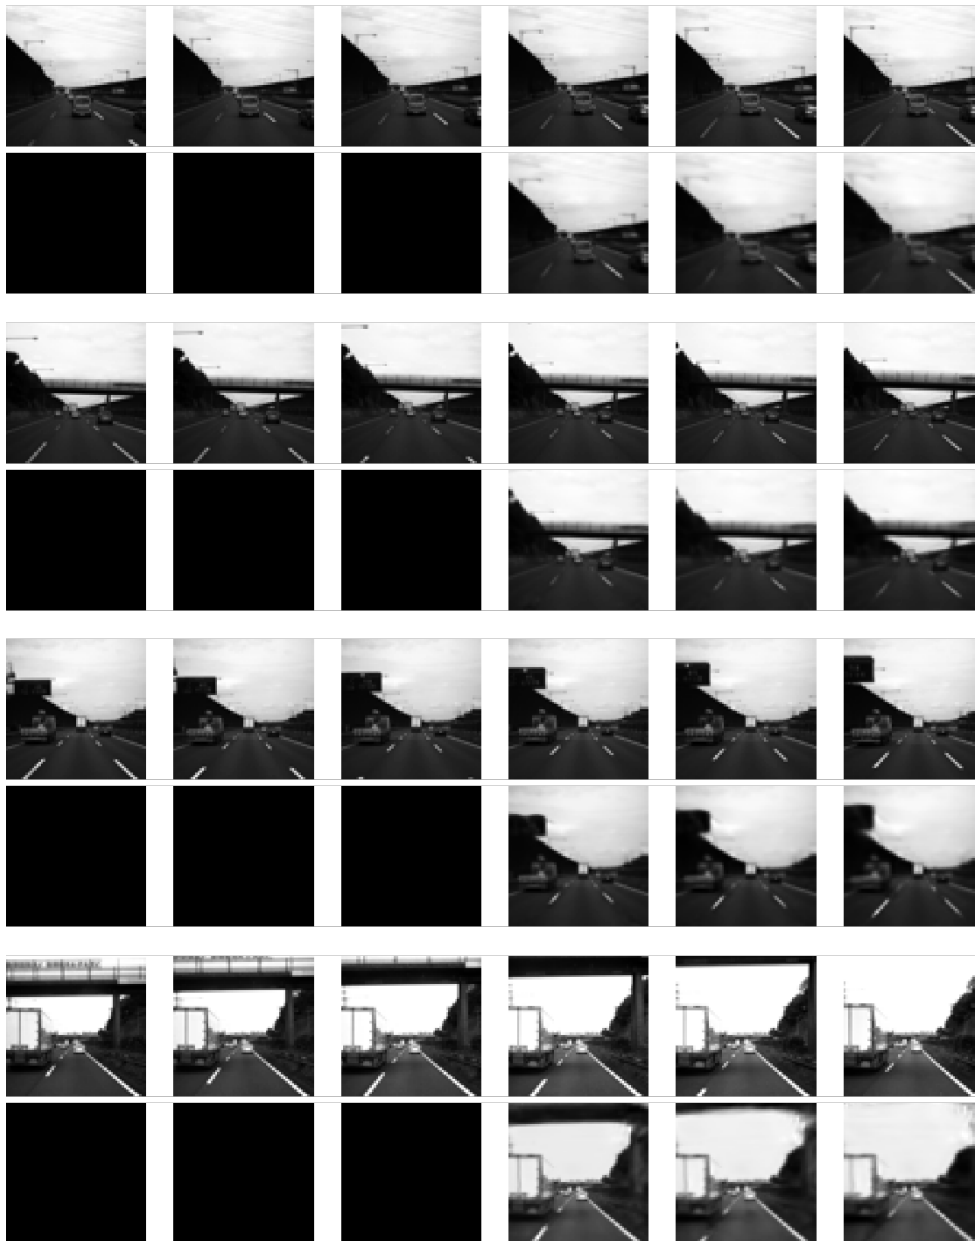

Figure 4: Results on highway driving dataset.

## 9   **2   Stereo Prediction**

10   We make a video of stereo prediction results for the whole test sequence. In each frame, the first one  
11   is the left view image, the second one is the visualization of filters, the third one is our prediction of  
12   the right view, and the last one is the groundtruth.

## 13   **3   Filter visualization**

14   We can visualize the dynamically generated filters of the trained model in a flow-like manner. The  
15   filter's elements are non-negative and sum to one because of the use of softmax layer. To visualize a  
16   filter, we first calculate the horizontal and vertical distance of each of its elements to the center of  
17   the filter. Taking the sum of the x-axis shifts, weighted with the filter value at that location, we then  
18   obtain the overall x-axis shift caused by one filter. Similarly, we can get the overall y-axis shift. A  
19   filter can thus approximately be visualized as a 2-dimensional vector. For example, a 9x9 filter with a  
20   value of 1 as its center top element can be seen as a vector with x-component 0 and y-component 2.

21   We then visualize the filters as an image where the hue and saturation of each pixel is set to respectively  
22   the orientation and magnitude of the filter at that location.
